# Supplementary material for: Towards deep NIR emissive simple D–A–D dyes: a novel acceptor block providing anti-Kasha's rule emission
Source: Royal Society of Chemistry journal article supplement (doi:10.1039/d4tc03132f), 2024-01-01
Supplement: d4tc03132f1.pdf [file d4tc03132f1.pdf]

## Supporting Information.

### **Towards deep NIR emissive simple D-A-D dyes: A novel acceptor block providing Anti-Kasha's rule emission**

Vladislav M. Korshunov,<sup>\*a</sup> Timofey N. Chmovzh,<sup>b,c</sup> Alisia V. Tsorieva,<sup>a</sup> Gleb A. Gruzdev<sup>d</sup>,  
Dadozhon M. Rakhimkulov<sup>b,e</sup>, Ilya V. Taydakov<sup>a</sup> and Oleg A. Rakitin<sup>\*b</sup>

<sup>a</sup>*P. N. Lebedev Physical Institute of the Russian Academy of Sciences, 53 Leninskiy Prospekt, 119991 Moscow, Russia*

<sup>b</sup>*N. D. Zelinsky Institute of Organic Chemistry Russian Academy of Sciences, 47 Leninsky Prospekt, Moscow, 119991, Russia; orakitin@ioc.ac.ru*

<sup>c</sup>*Nanotechnology Education and Research Center, South Ural State University, 76 Lenina Avenue, Chelyabinsk, 454080, Russia; tim1661@yandex.ru*

<sup>d</sup>*Moscow State University M.V. Lomonosov, faculty of Biology, 119991 Moscow, Russia*

<sup>e</sup>*Mendeleev University of Chemistry and Technology of Russia, Miusskaya sqr., 9, Moscow 125047, Russian Federation*

E-mail: korshunovvm@lebedev.ru, orakitin@ioc.ac.ru

#### **Table of contents:**

|                                                                |     |
|----------------------------------------------------------------|-----|
| <b>SI-1.</b> NMR spectra <sup>1</sup> H, <sup>13</sup> C ..... | S2  |
| <b>SI-2</b> Crystal data.....                                  | S12 |
| <b>SI-3.</b> Photophysical parameters.....                     | S13 |
| <b>SI-4.</b> Quantum-chemical calculations.....                | S14 |
| <b>SI-5.</b> Cytotoxicity.....                                 | S15 |

# SI-1 NMR spectra <sup>1</sup>H, <sup>13</sup>C

## 4-Bromo-7-(piperidin-1-yl)-[1,2,5]selenadiazolo[3,4-d]pyridazine (5a)

### <sup>1</sup>H NMR(300 MHz)

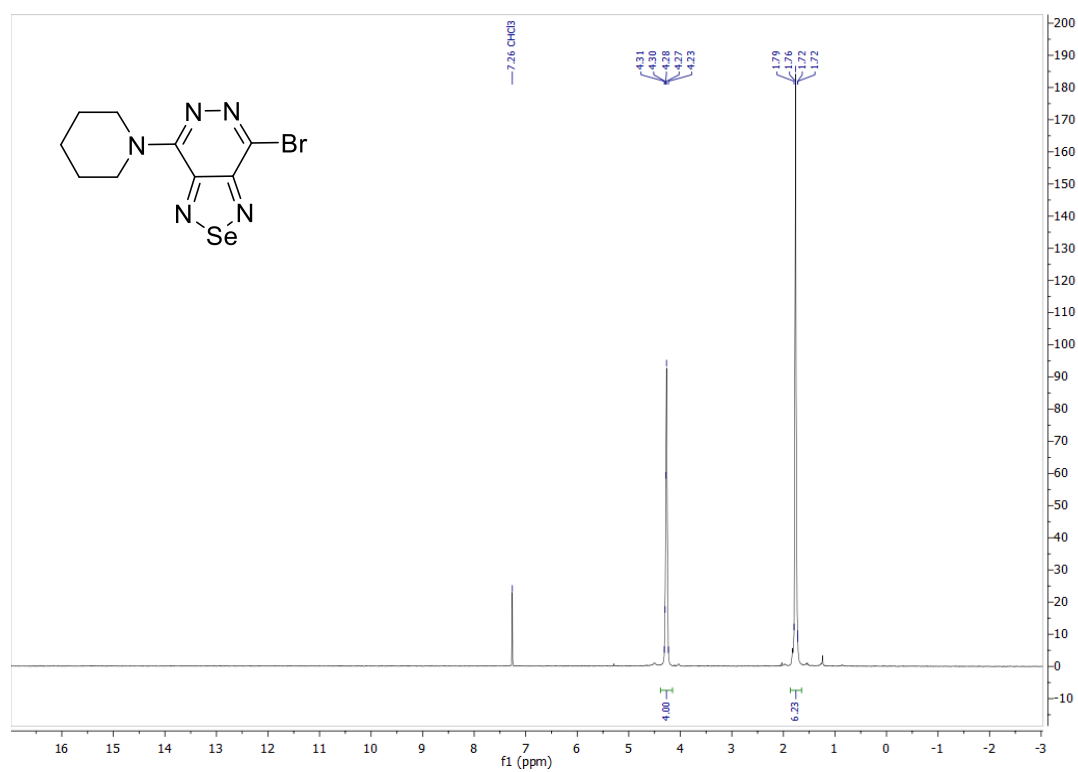

### <sup>13</sup>C NMR(75 MHz)

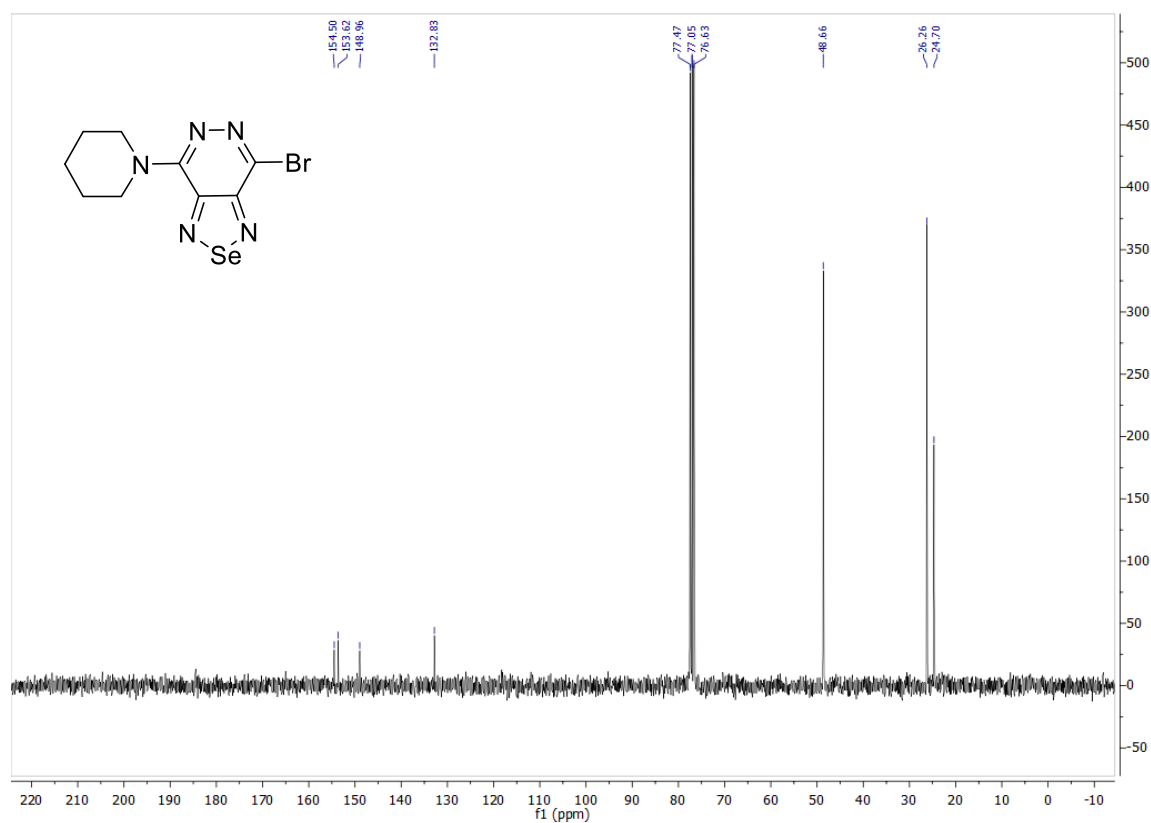

# 4-Bromo-7-(1,2,3,4,4a,9a-hexahydro-9H-carbazol-9-yl)-[1,2,5]selenadiazolo[3,4-d]pyridazine (5b)

## <sup>1</sup>H NMR(300 MHz)

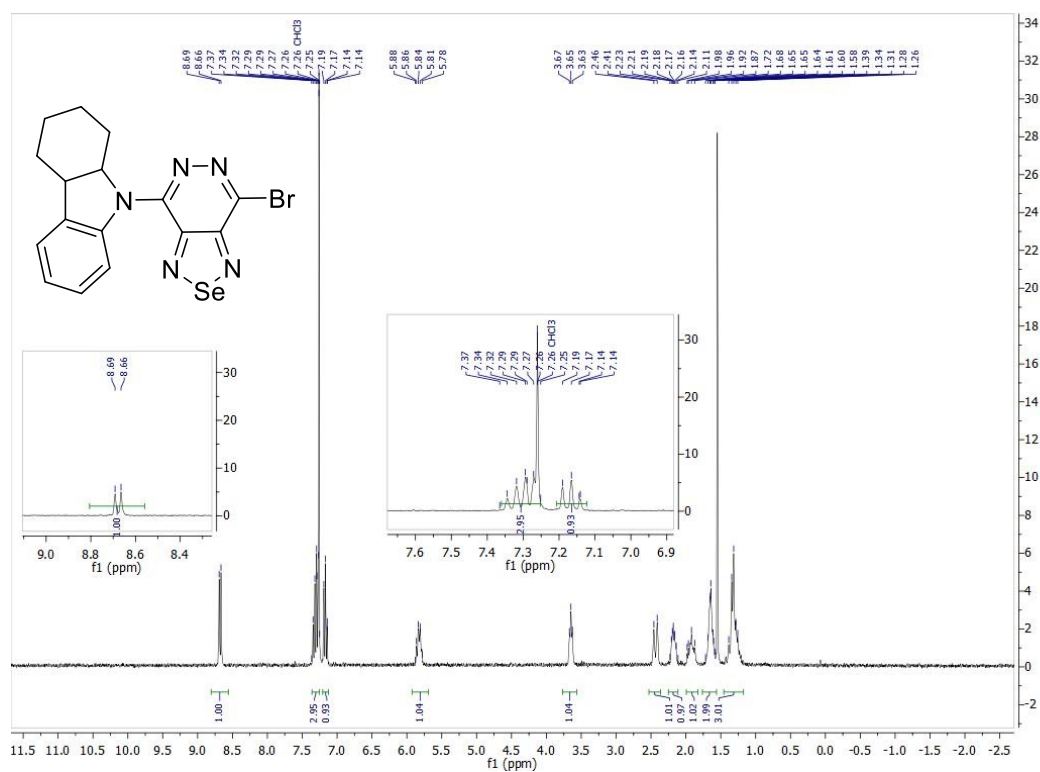

## <sup>13</sup>C NMR(75 MHz)

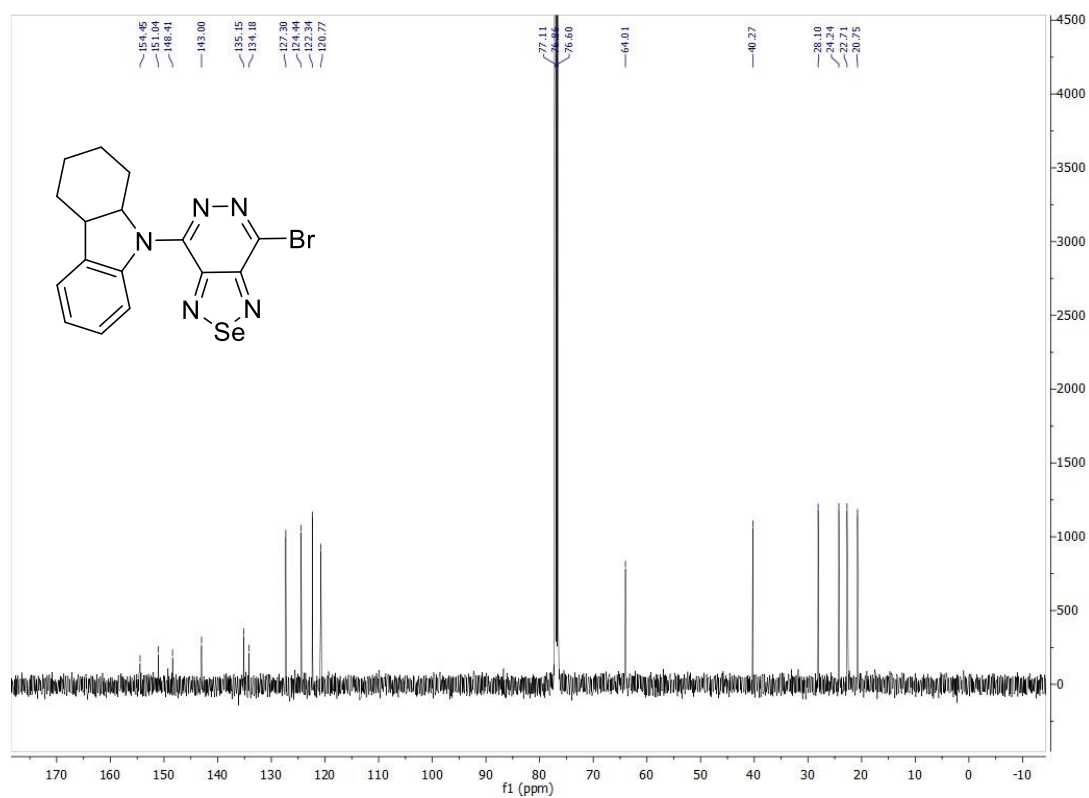

# 4-Bromo-7-(2,3,3a,8b-tetrahydrocyclopenta[b]indol-4(1H)-yl)-[1,2,5]selenadiazolo[3,4-d]pyridazine (5c).

## <sup>1</sup>H NMR(300 MHz)

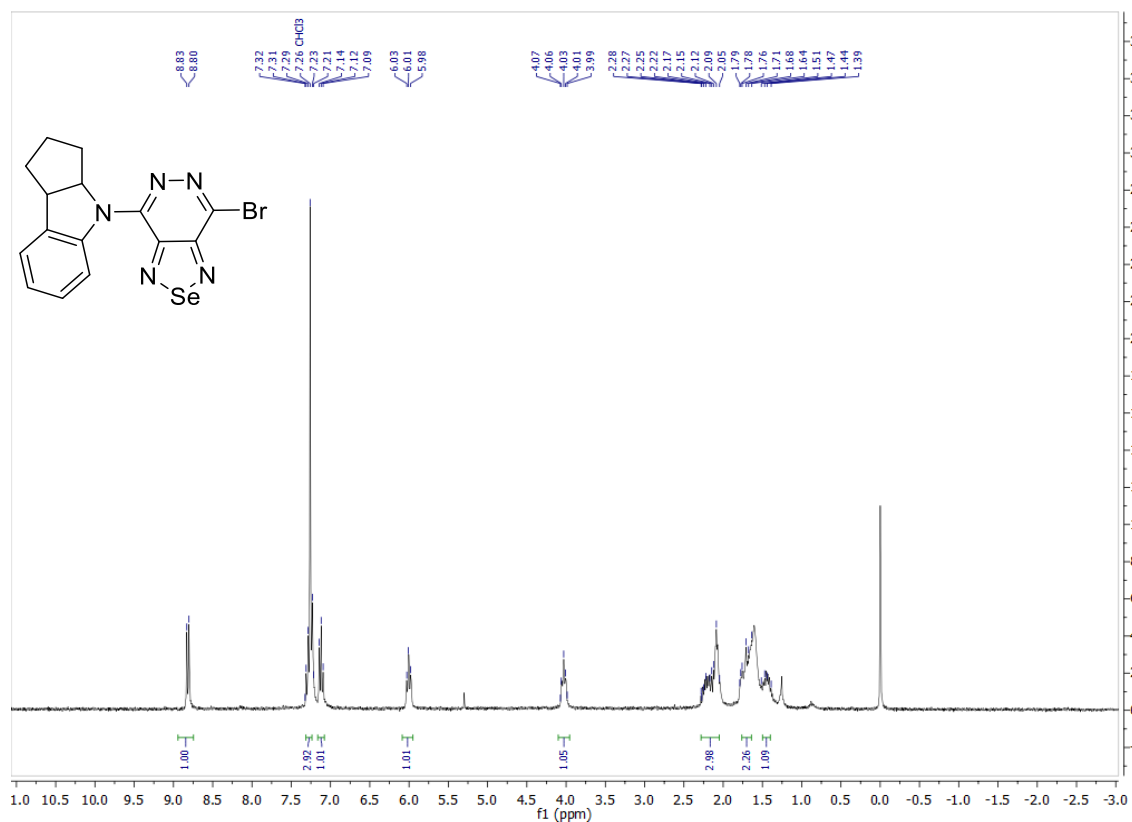

## <sup>13</sup>C NMR(75 MHz)

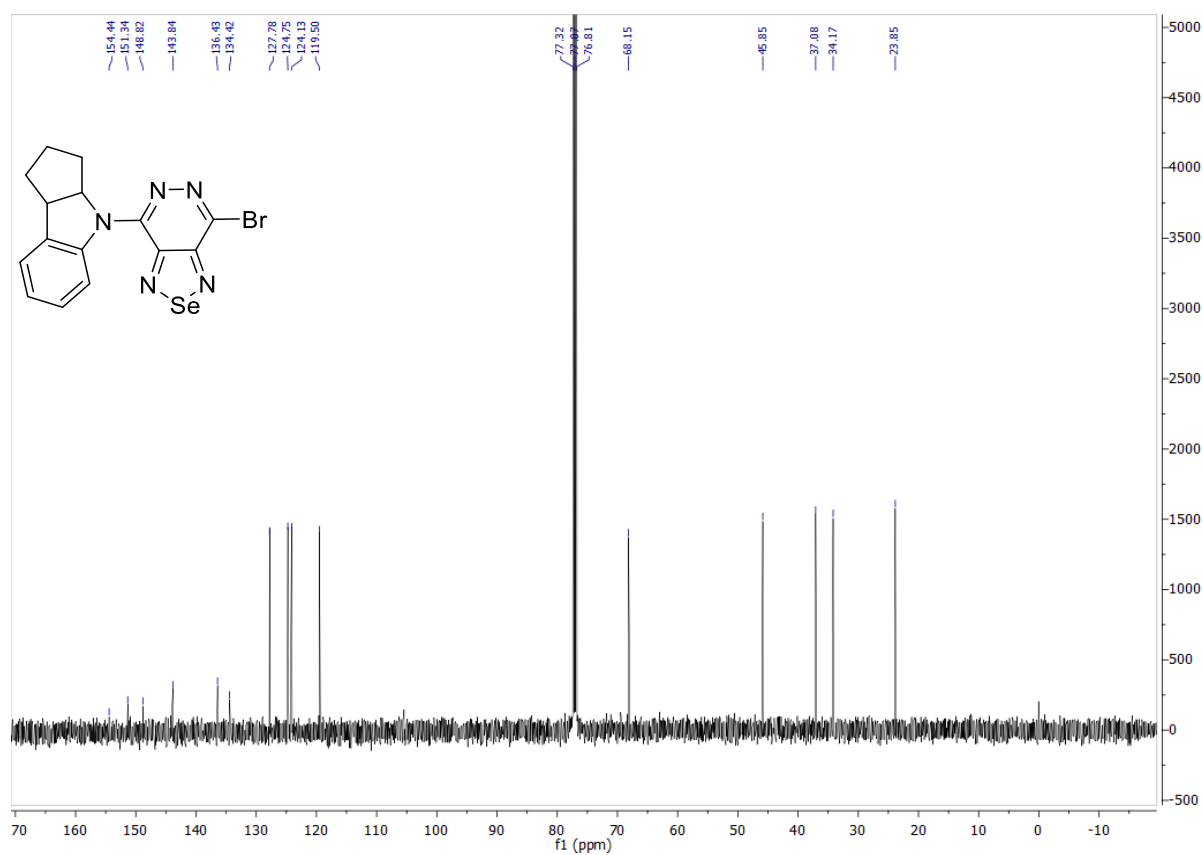

# 4-Bromo-7-(2,3,3a,8b-tetrahydrocyclopenta[b]indol-4(1H)-yl)-[1,2,5]selenadiazolo[3,4-d]pyridazine (5d).

## $^1\text{H NMR}$ (300 MHz)

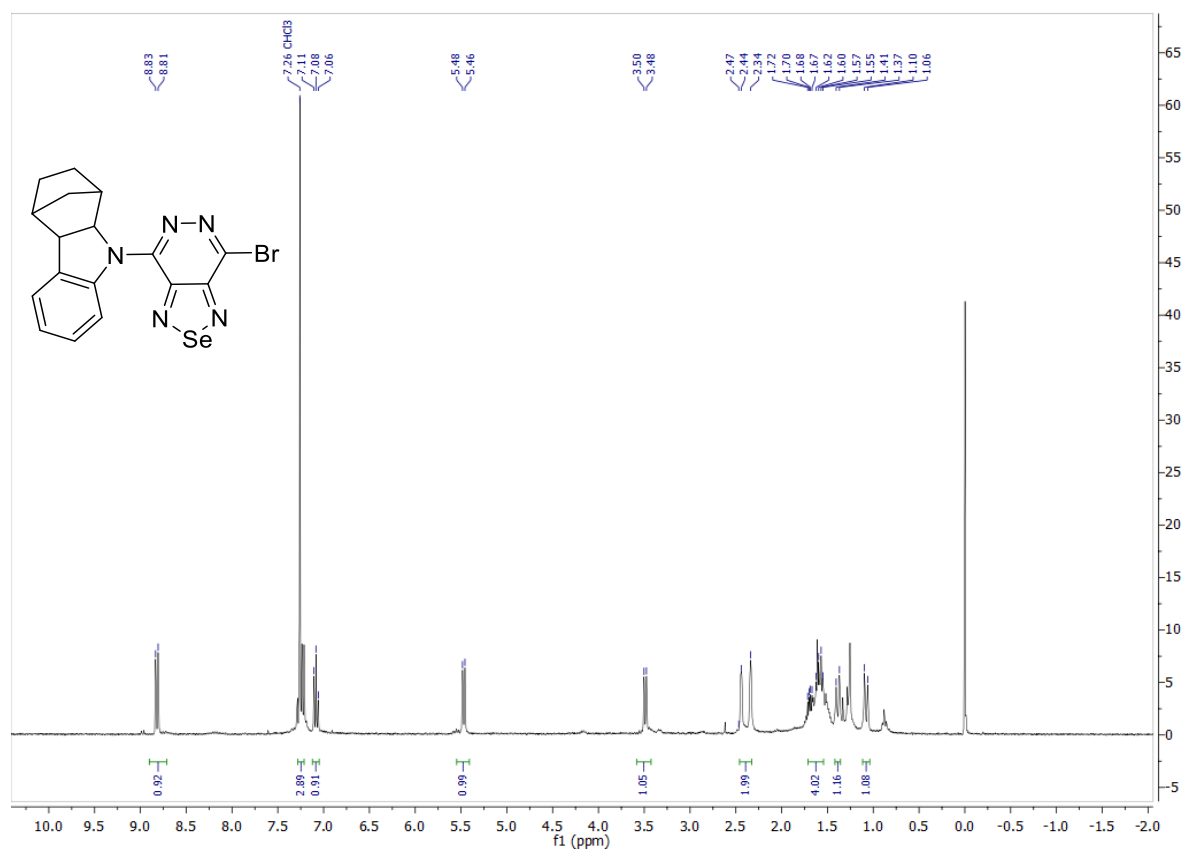

## $^{13}\text{C NMR}$ (75 MHz)

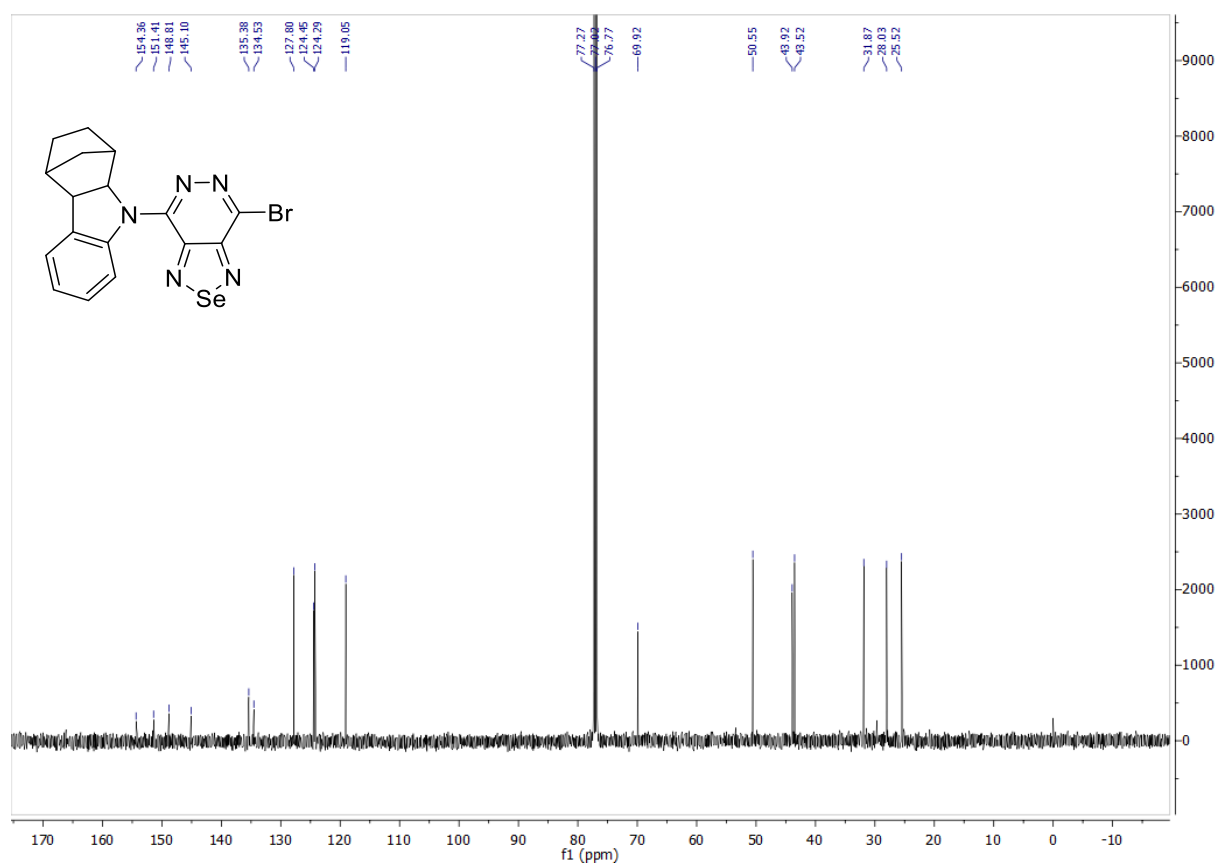

# 4,7-Di(piperidin-1-yl)-[1,2,5]selenadiazolo[3,4-d]pyridazine (6a)

<sup>1</sup>H NMR(300 MHz)

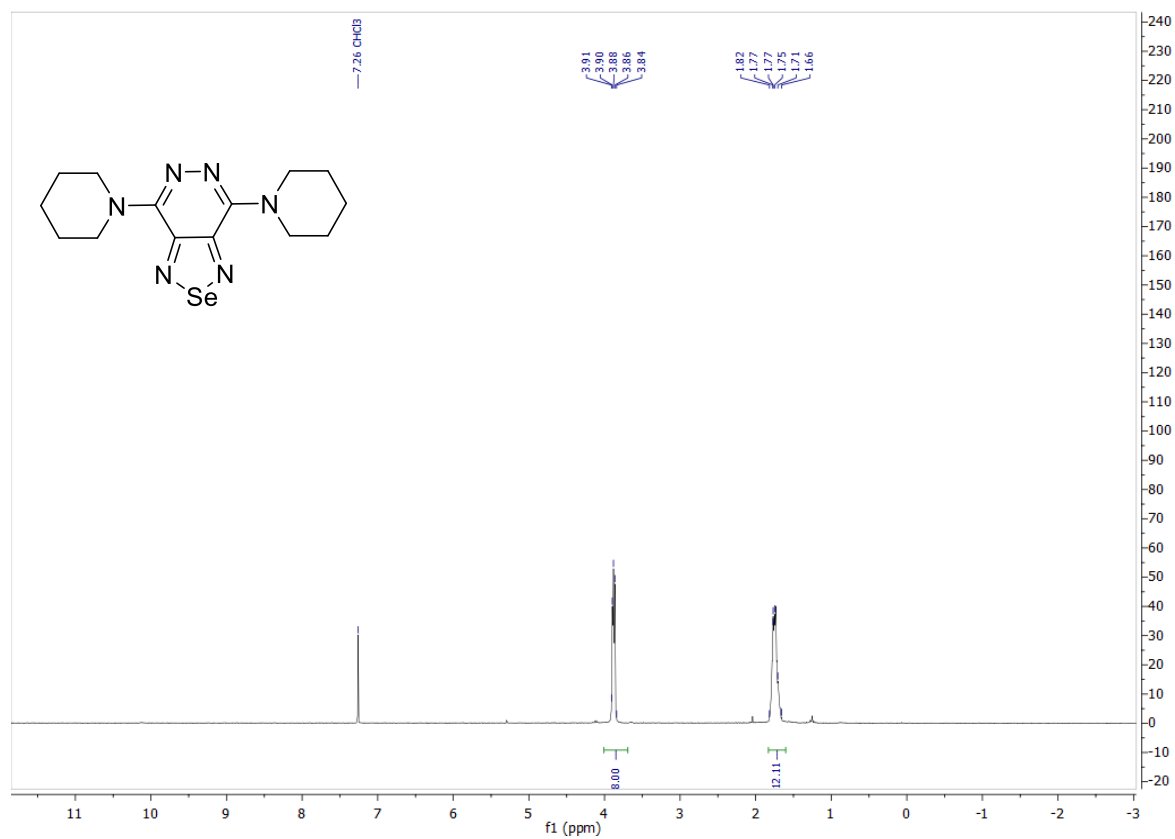

<sup>13</sup>C NMR(75 MHz)

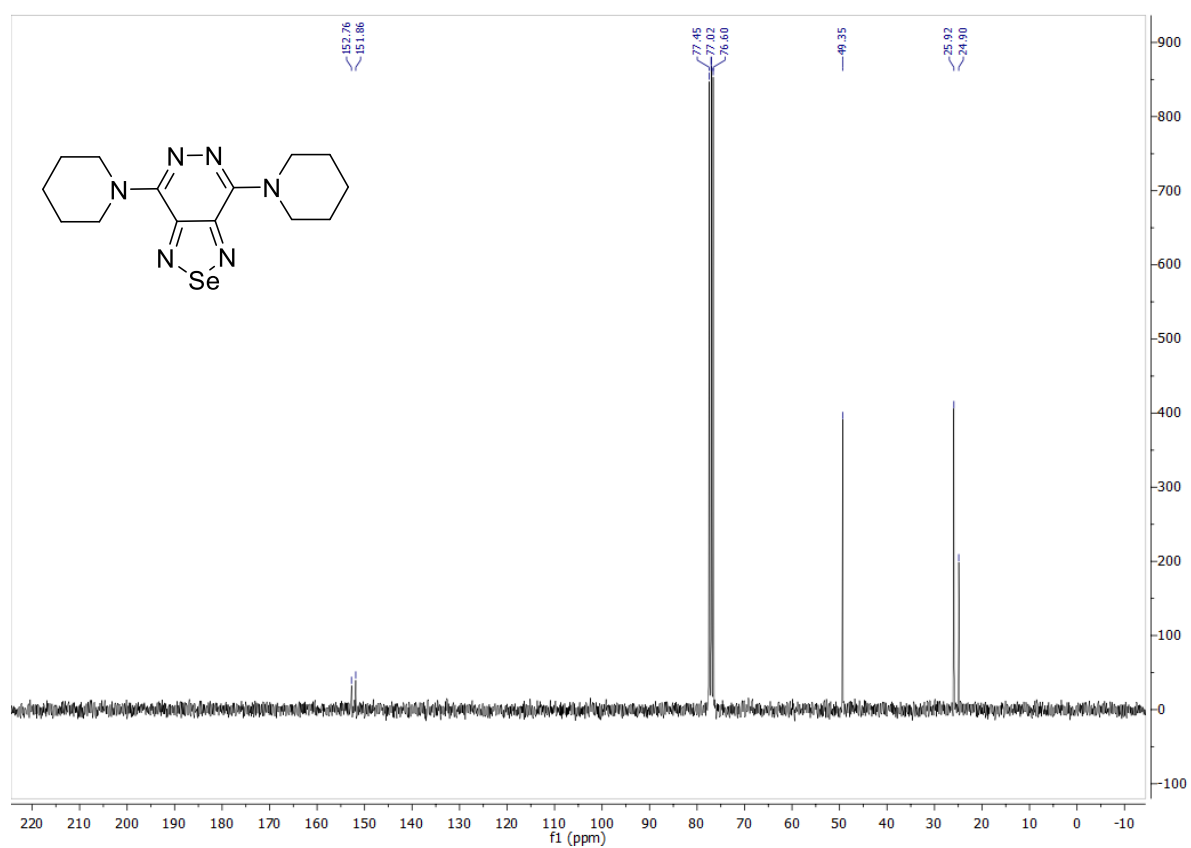

# 4,7-Bis(1,2,3,4,4a,9a-hexahydro-9H-carbazol-9-yl)-[1,2,5]selenadiazolo[3,4-d]pyridazine (6b)

## <sup>1</sup>H NMR(300 MHz)

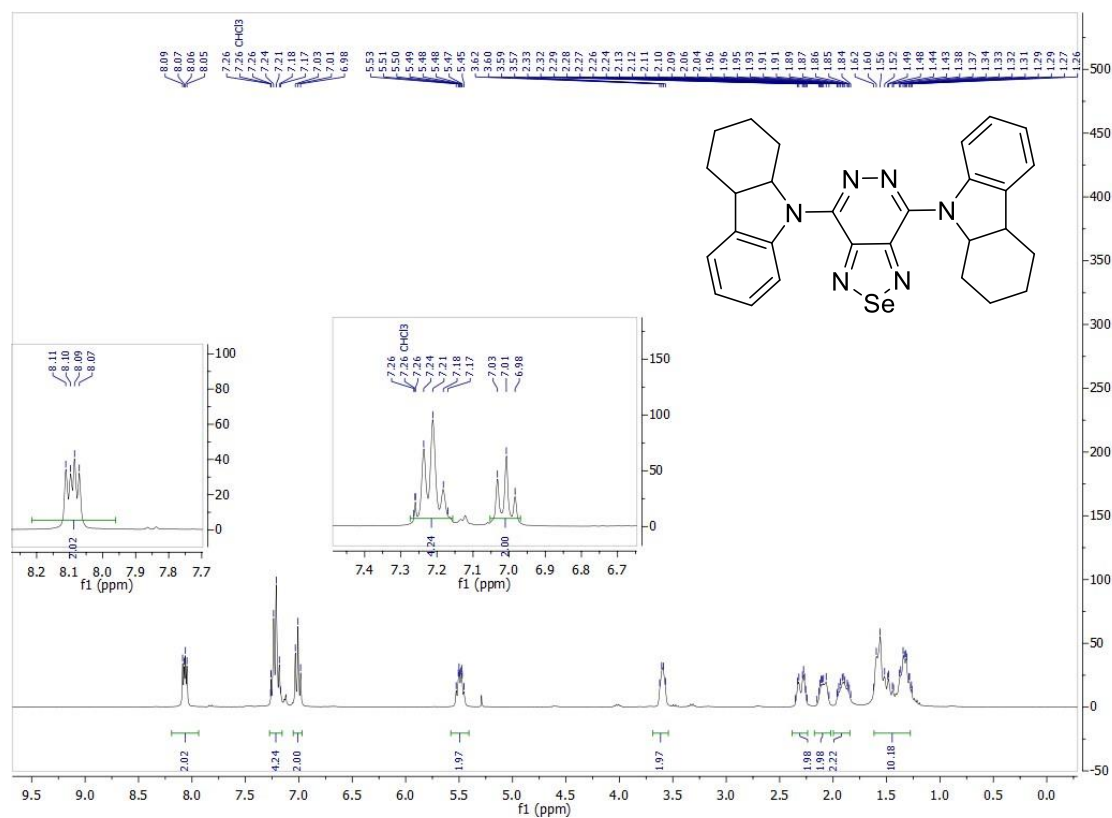

## <sup>13</sup>C NMR(75 MHz)

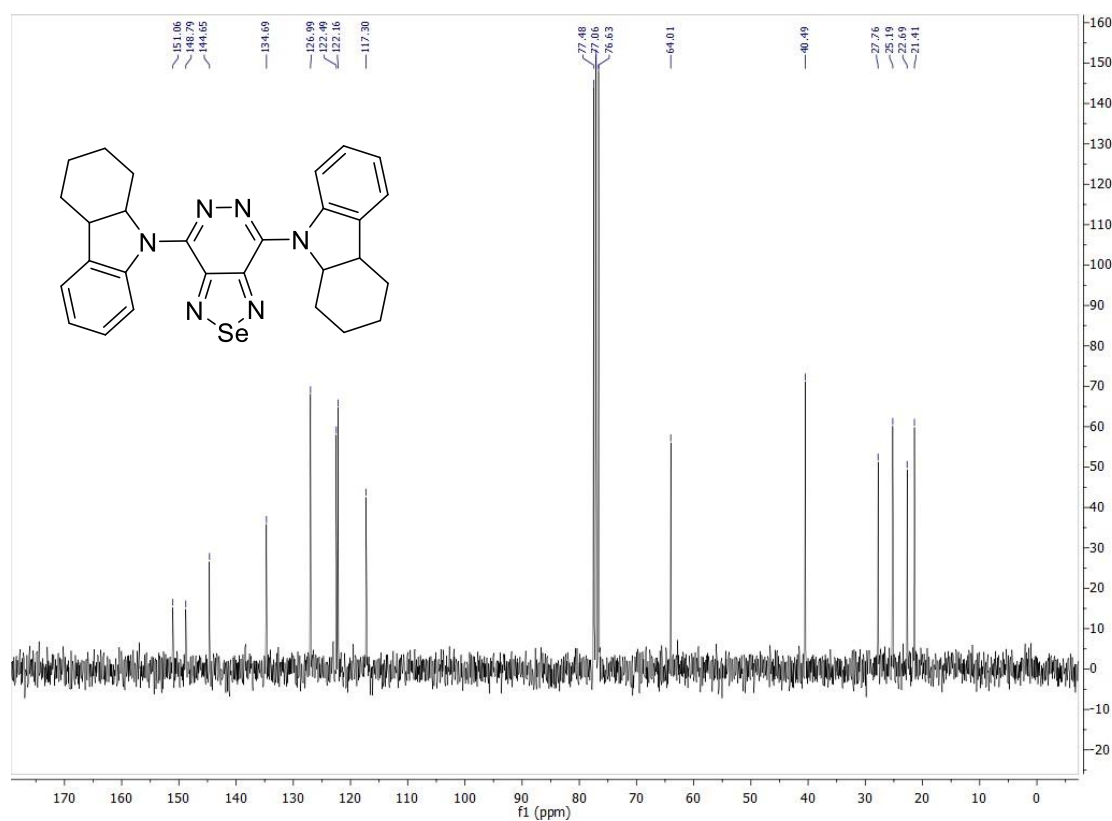

# 4,7-Bis(2,3,3a,8b-tetrahydrocyclopenta[b]indol-4(1H)-yl)-[1,2,5]selenadiazolo[3,4-d]pyridazine (6c)

<sup>1</sup>H NMR(300 MHz)

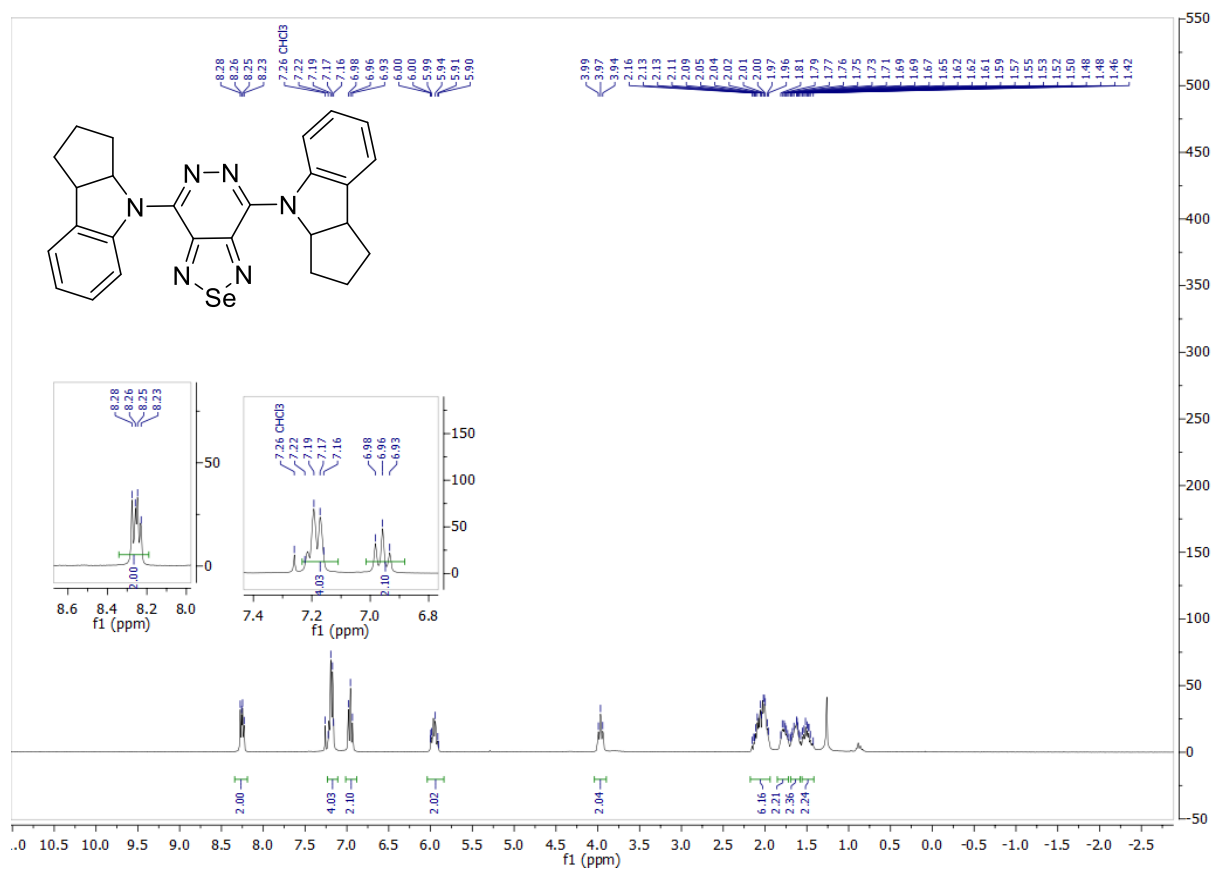

<sup>13</sup>C NMR(75 MHz)

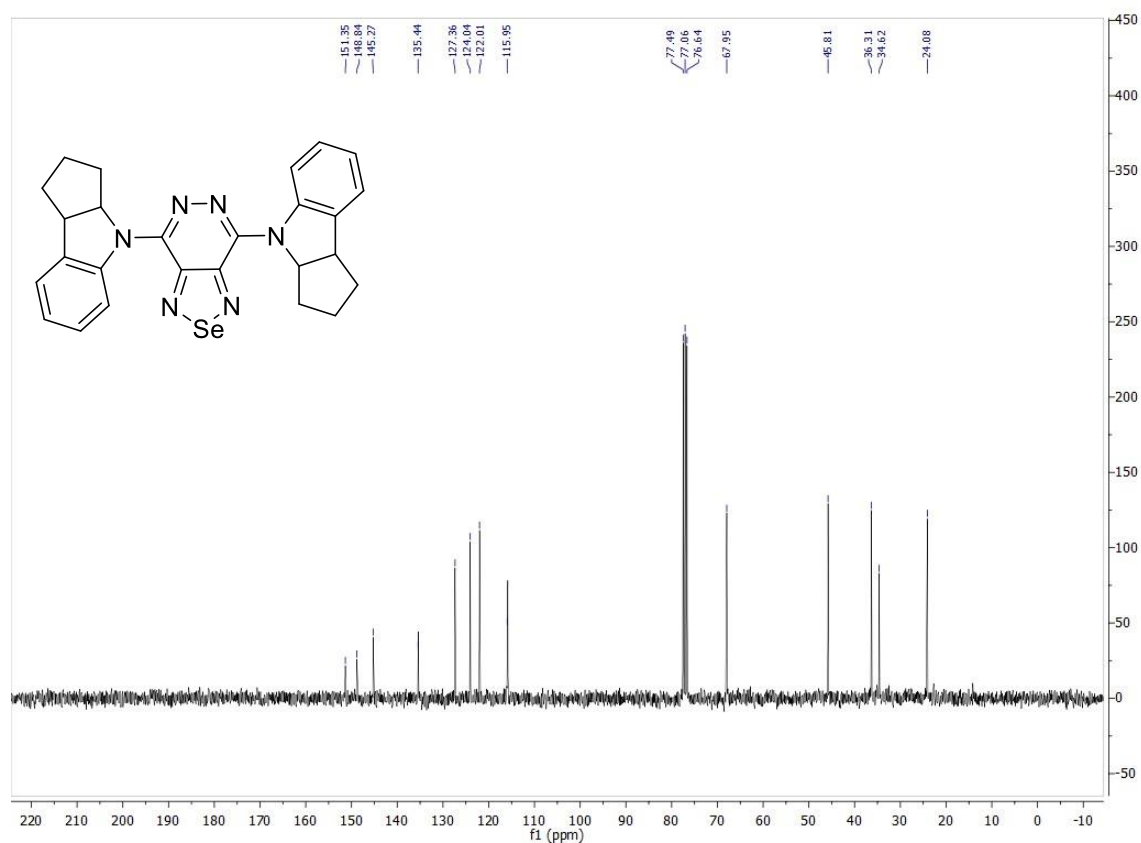



# 4,7-Bis(1,2,3,4,4a,9a-hexahydro-9H-1,4-methanocarbazol-9-yl)-[1,2,5]selenadiazolo[3,4-d]pyridazine (6d)

$^1\text{H}$  NMR(300 MHz)

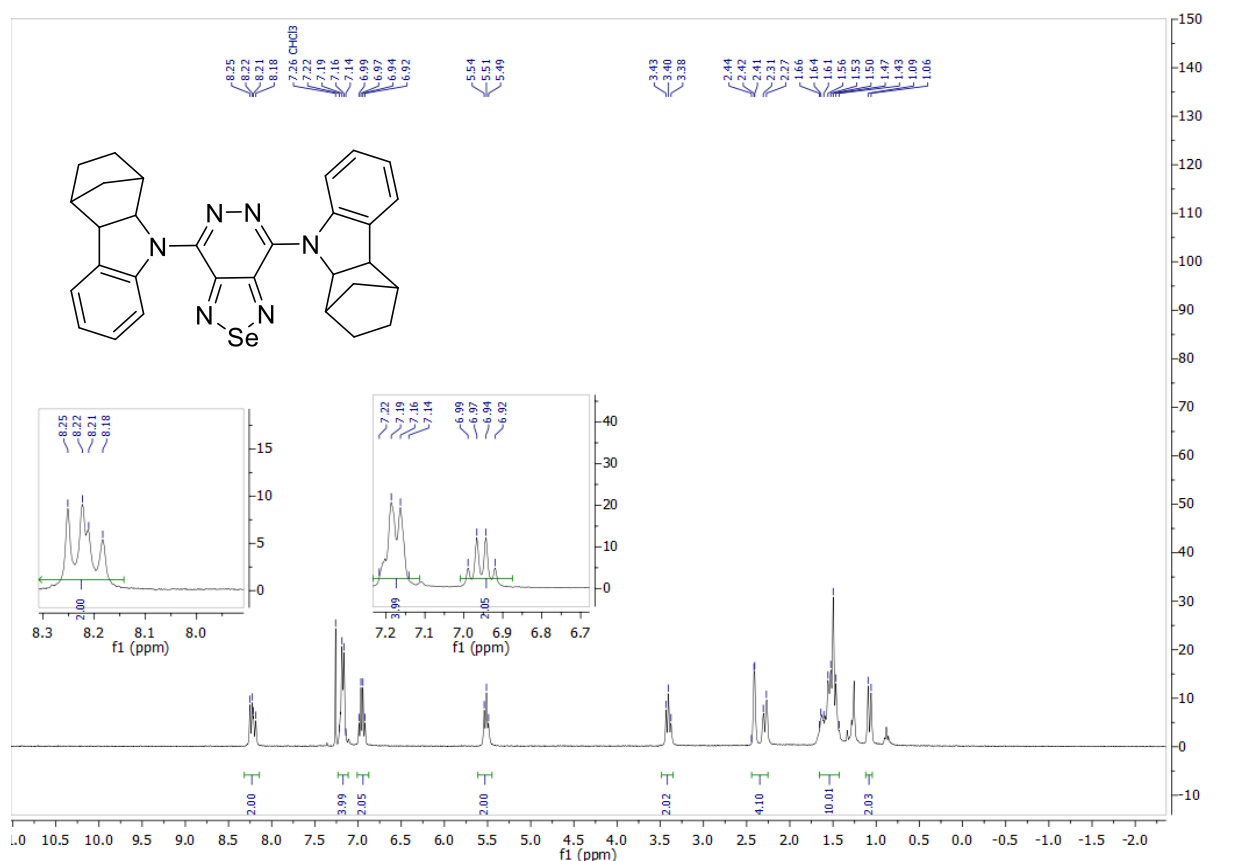

$^{13}\text{C}$  NMR(75 MHz)

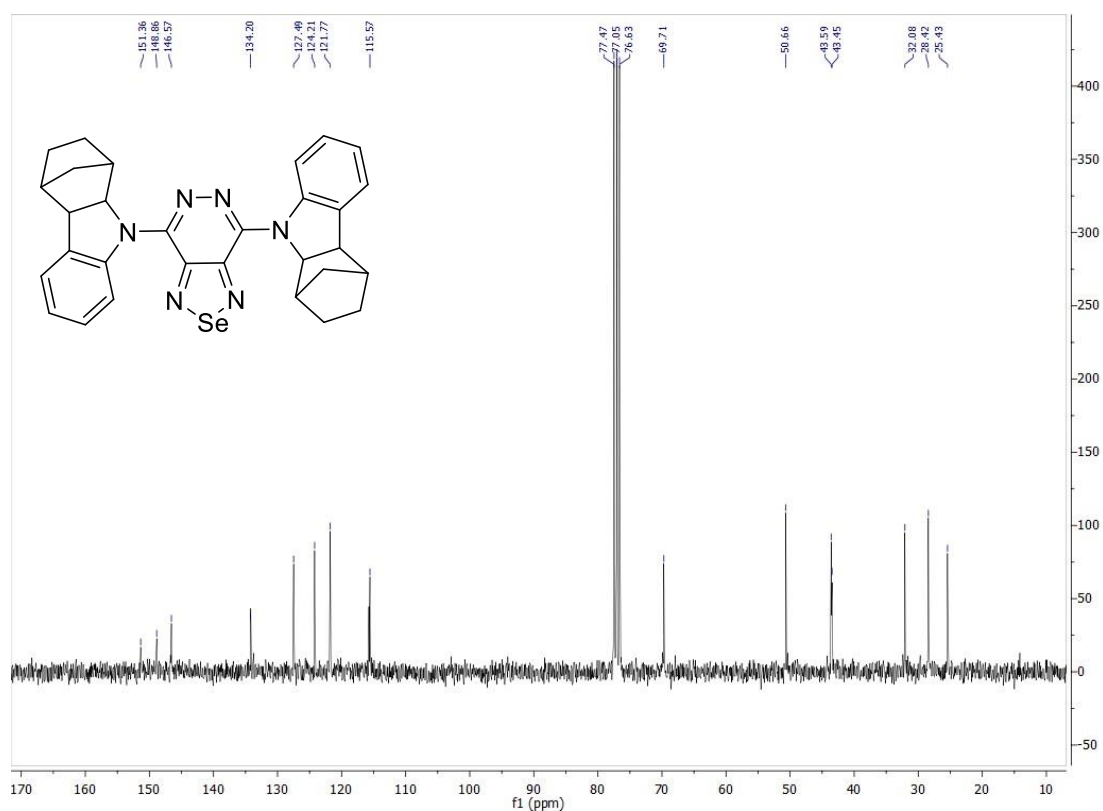

# 4,7-di(9H-carbazol-9-yl)-[1,2,5]selenadiazolo[3,4-d]pyridazine (6e)

## $^1\text{H}$ NMR(300 MHz)

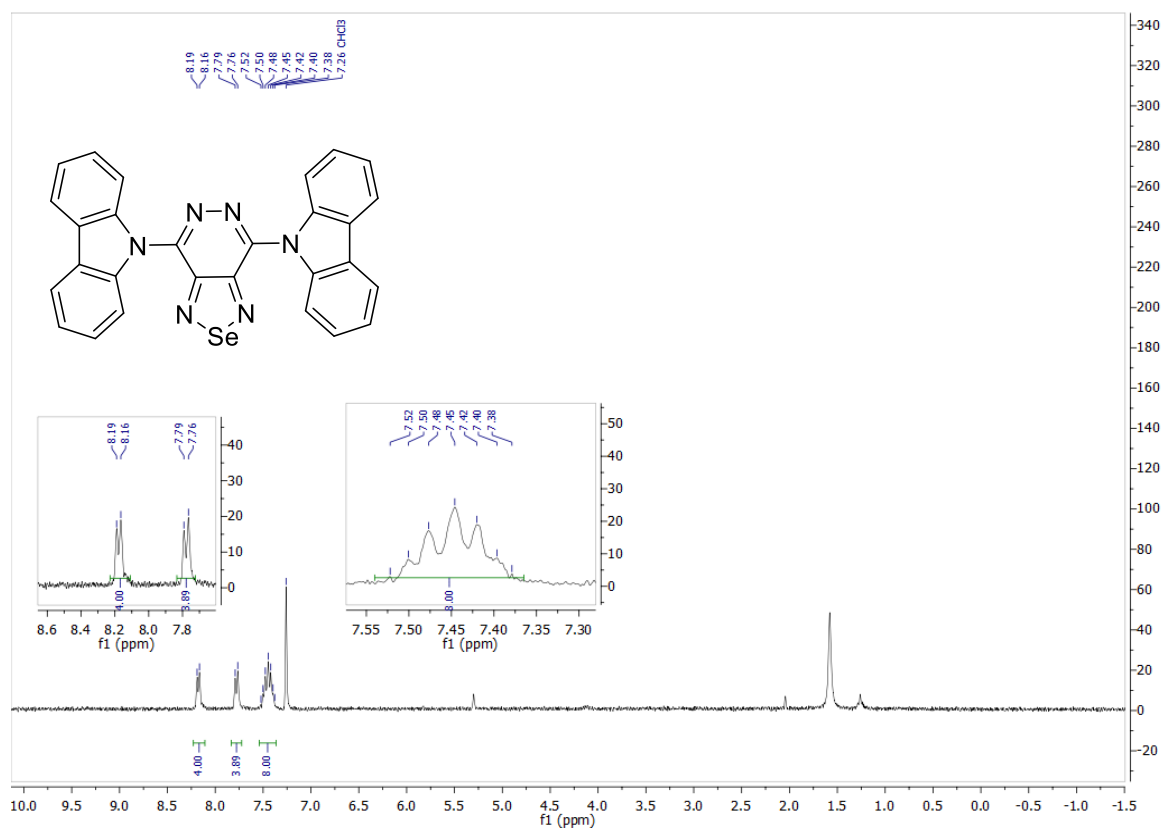

## $^{13}\text{C}$ NMR(75 MHz)

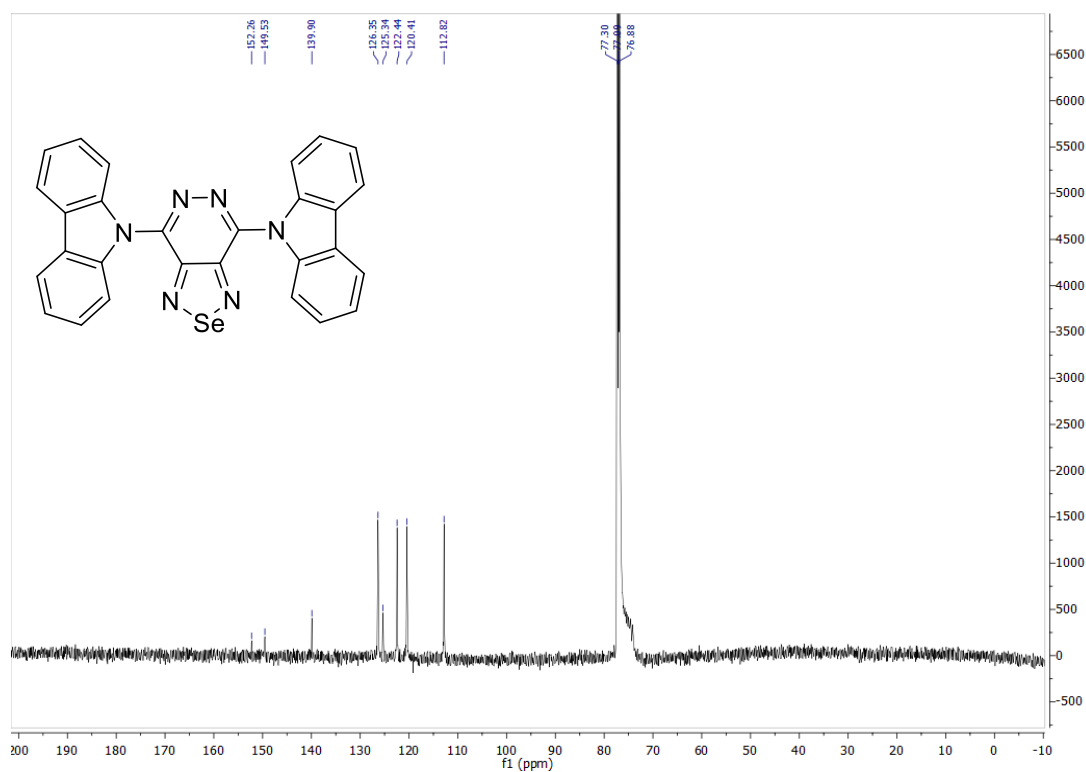

**4-(1,2,3,4,4a,9a-Hexahydro-9H-carbazol-9-yl)-7-(2,3,3a,8b-tetrahydrocyclopenta[b]indol-4(1H)-yl)-[1,2,5]selenadiazolo[3,4-d]pyridazine (7c)**

**<sup>1</sup>H NMR(300 MHz)**

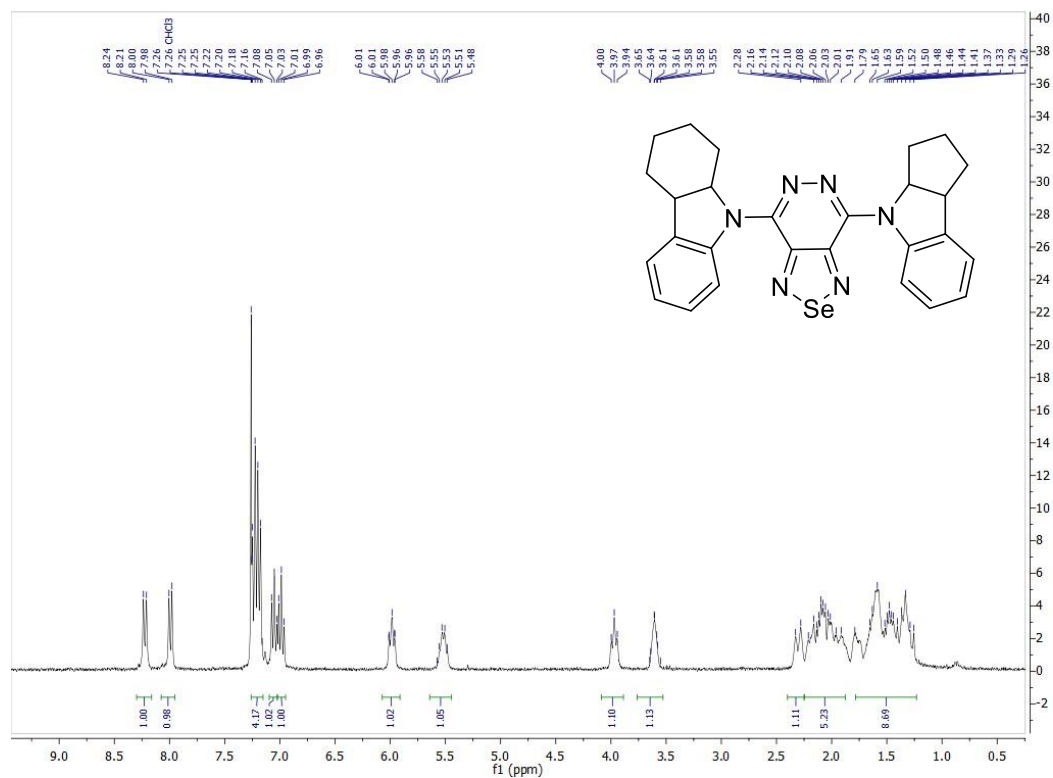

**<sup>13</sup>C NMR(75 MHz)**

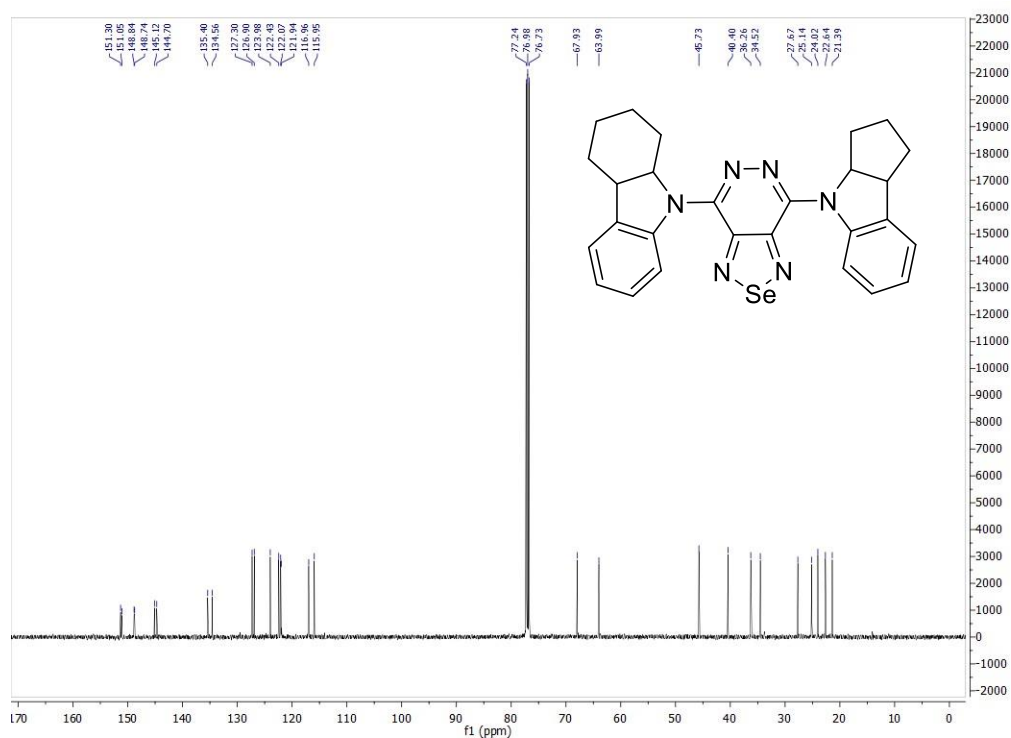

# 4-(1,2,3,4,4a,9a-Hexahydro-9H-1,4-methanocarbazol-9-yl)-7-(1,2,3,4,4a,9a-hexahydro-9H-carbazol-9-yl)-[1,2,5]selenadiazolo[3,4-d]pyridazine (7d)

<sup>1</sup>H NMR(300 MHz)

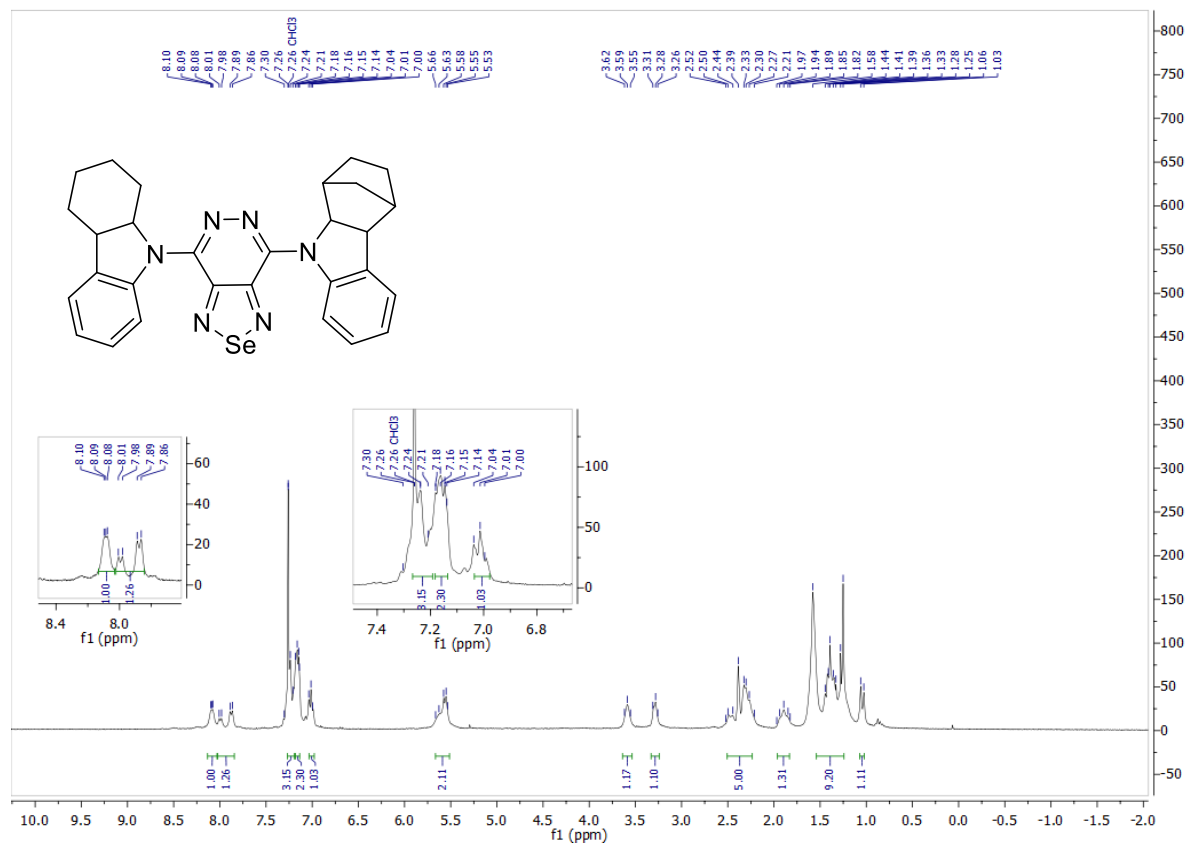

<sup>13</sup>C NMR(75 MHz)

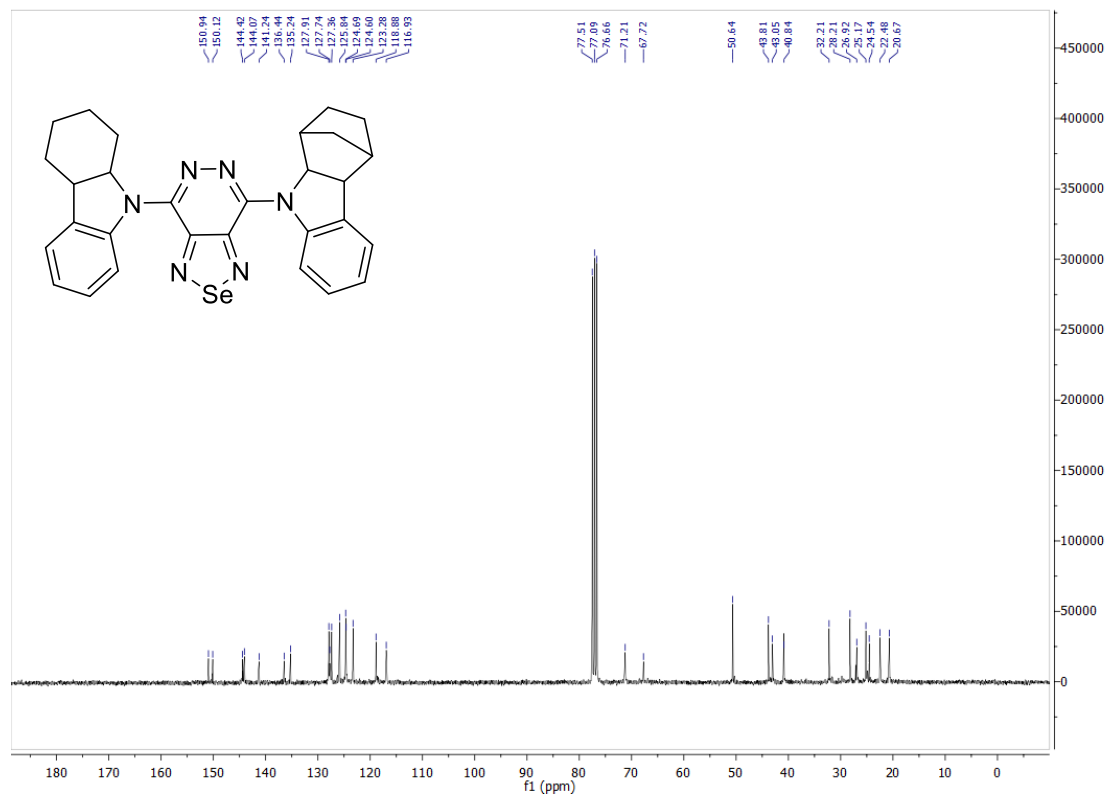

4-(9H-carbazol-9-yl)-7-(1,2,3,4,4a,9a-hexahydro-9H-carbazol-9-yl)-[1,2,5]selenadiazolo[3,4-d]pyridazine (7e)

<sup>1</sup>H NMR(300 MHz)

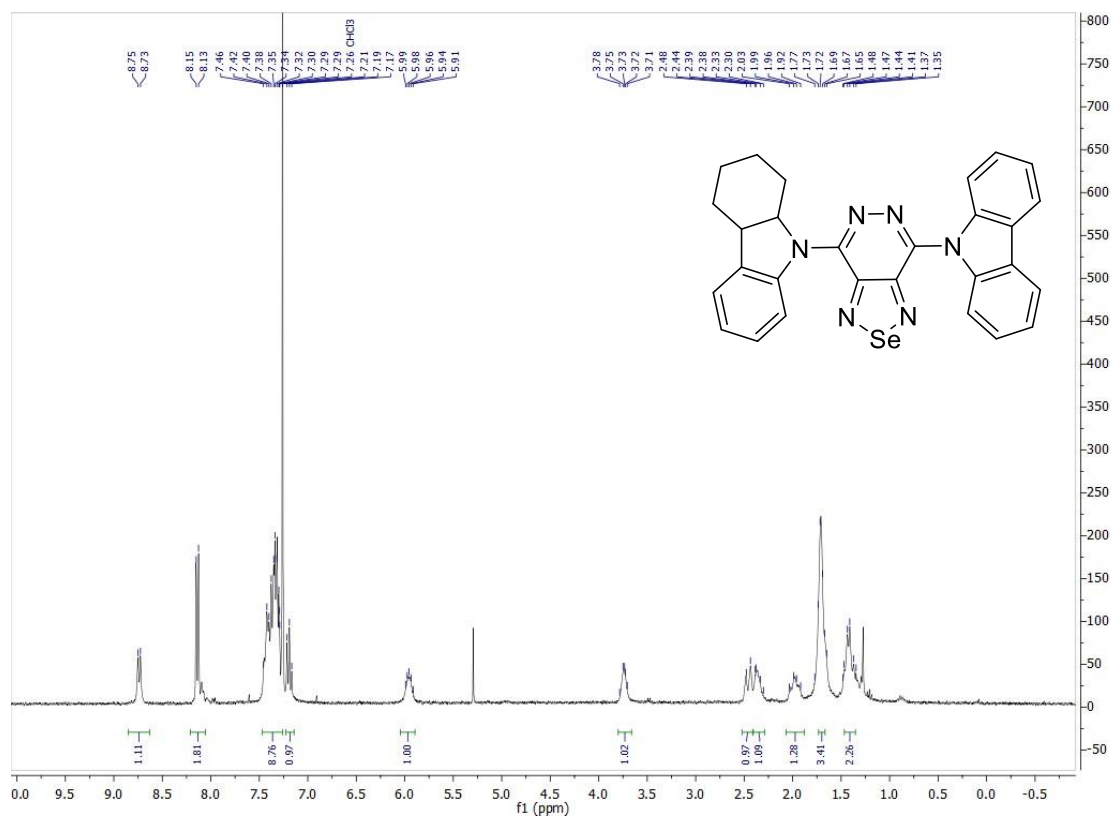

<sup>13</sup>C NMR(75 MHz)

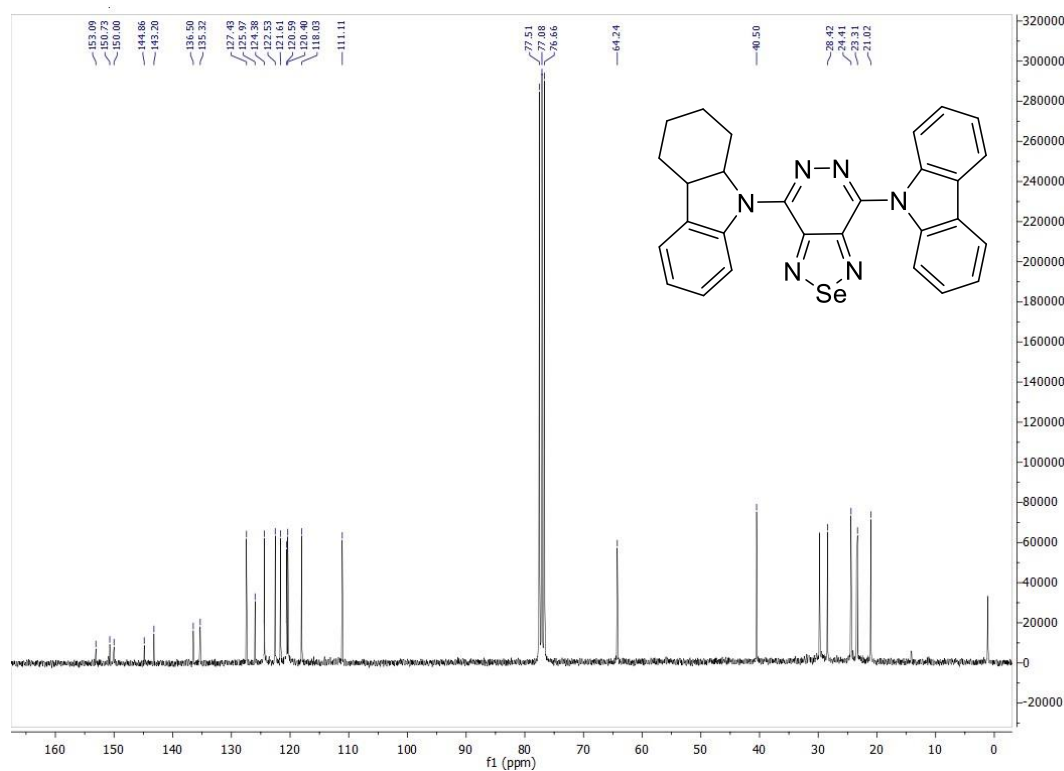

## SI-2 Crystal data

**Table 1.** Crystal data and structure refinement for compound (**5a**)

|                                   |                                                    |          |
|-----------------------------------|----------------------------------------------------|----------|
| Empirical formula                 | C <sub>9</sub> H <sub>10</sub> BrN <sub>5</sub> Se |          |
| Formula weight                    | 347.09                                             |          |
| Temperature                       | 100.00(10) K                                       |          |
| Wavelength                        | 1.54184 Å                                          |          |
| Crystal system                    | Monoclinic                                         |          |
| Space group                       | C2/c                                               |          |
| Unit cell dimensions              | a = 32.5188(3) Å                                   | α = 90°. |
| b = 6.73250(10) Å                 | β = 95.2020(10)°.                                  |          |
| c = 20.1942(2) Å                  | γ = 90°.                                           |          |
| Volume                            | 4402.96(9) Å <sup>3</sup>                          |          |
| Z                                 | 16                                                 |          |
| Density (calculated)              | 2.094 Mg/m <sup>3</sup>                            |          |
| Absorption coefficient            | 8.714 mm <sup>-1</sup>                             |          |
| F(000)                            | 2688                                               |          |
| Crystal size                      | 0.459 x 0.096 x 0.067 mm <sup>3</sup>              |          |
| Theta range for data collection   | 2.729 to 80.389°.                                  |          |
| Index ranges                      | -41 ≤ h ≤ 41, -8 ≤ k ≤ 8, -25 ≤ l ≤ 25             |          |
| Reflections collected             | 9133                                               |          |
| Independent reflections           | 9133                                               |          |
| Completeness to theta = 67.684°   | 99.9 %                                             |          |
| Absorption correction             | Gaussian                                           |          |
| Max. and min. transmission        | -0.010 and 10000000.000                            |          |
| Refinement method                 | Full-matrix least-squares on F <sup>2</sup>        |          |
| Data / restraints / parameters    | 9133 / 30 / 309                                    |          |
| Goodness-of-fit on F <sup>2</sup> | 1.050                                              |          |
| Final R indices [I > 2σ(I)]       | R1 = 0.0415, wR2 = 0.1292                          |          |
| R indices (all data)              | R1 = 0.0427, wR2 = 0.1308                          |          |
| Largest diff. peak and hole       | 1.014 and -1.142 e.Å <sup>-3</sup>                 |          |

### SI-3 Spectroscopy

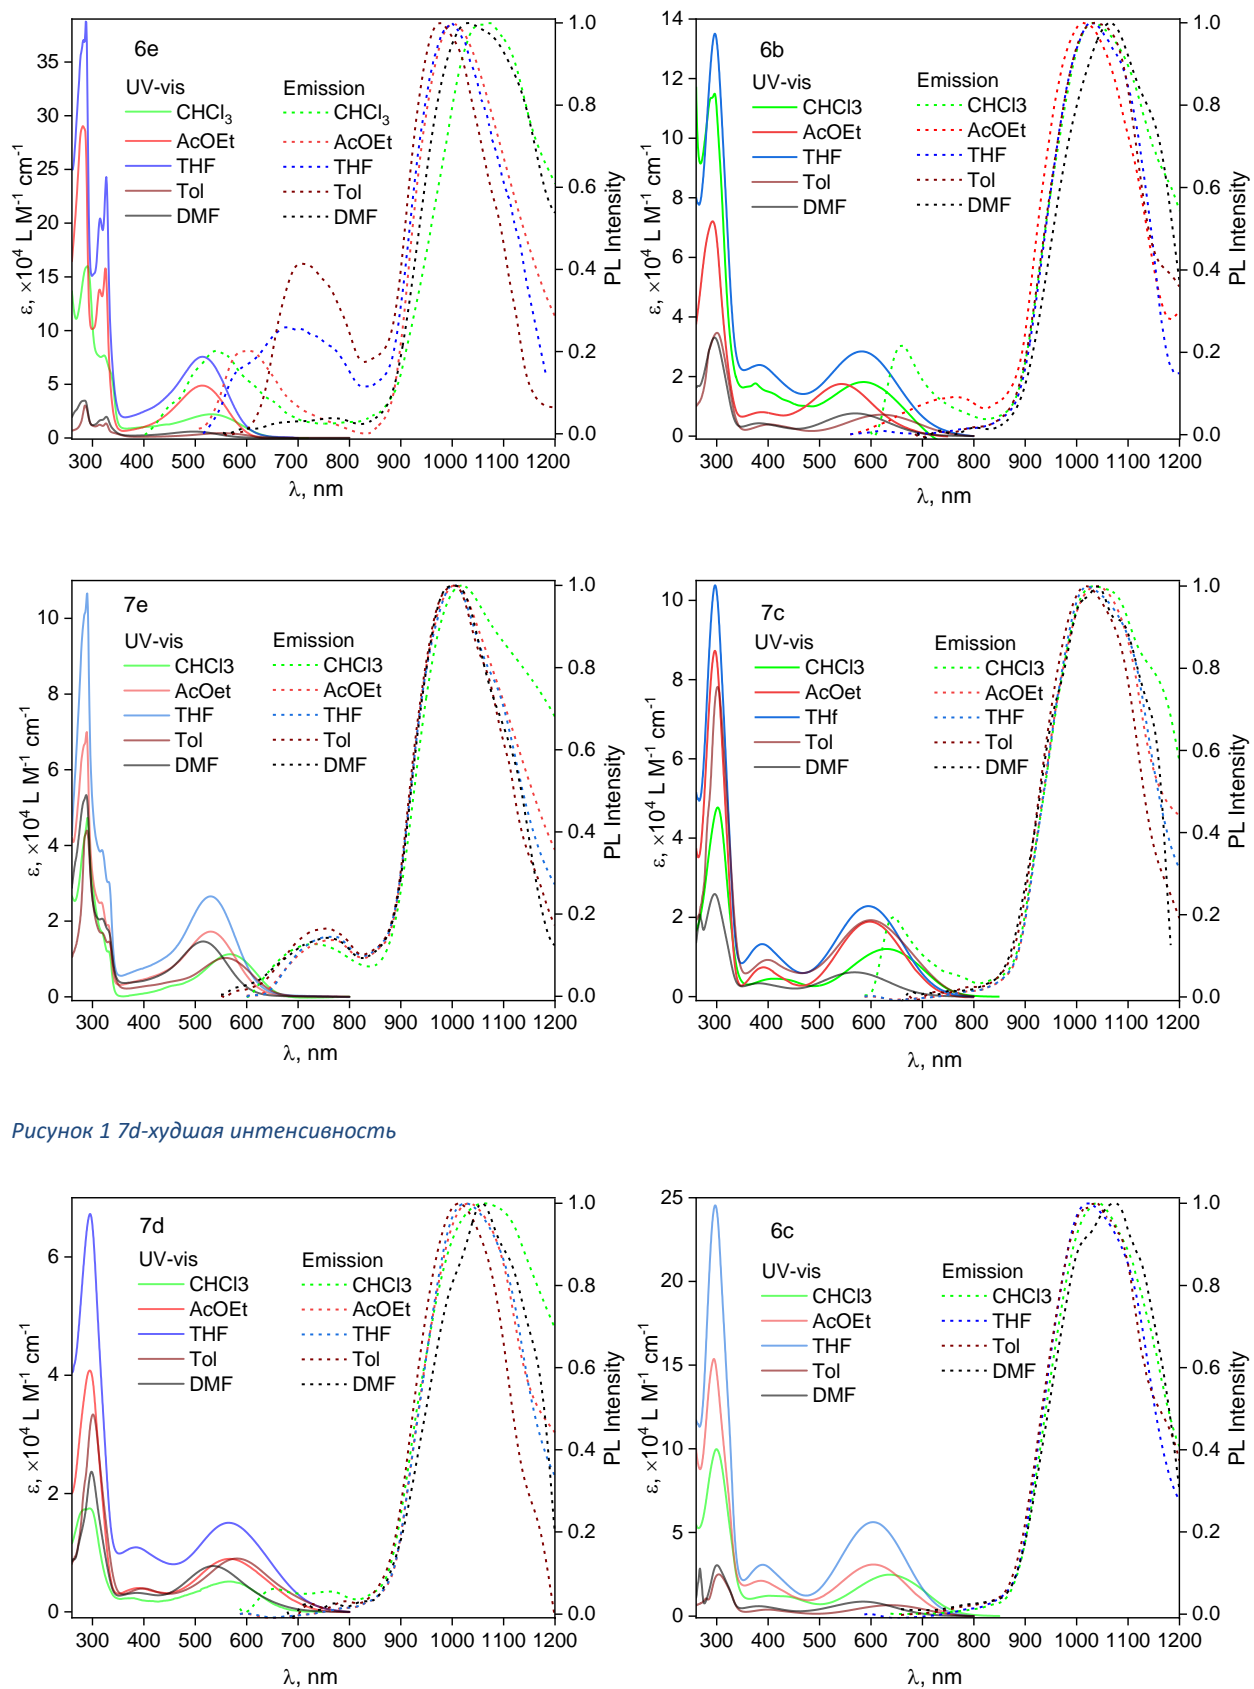

Рисунок 1 7d-худшая интенсивность

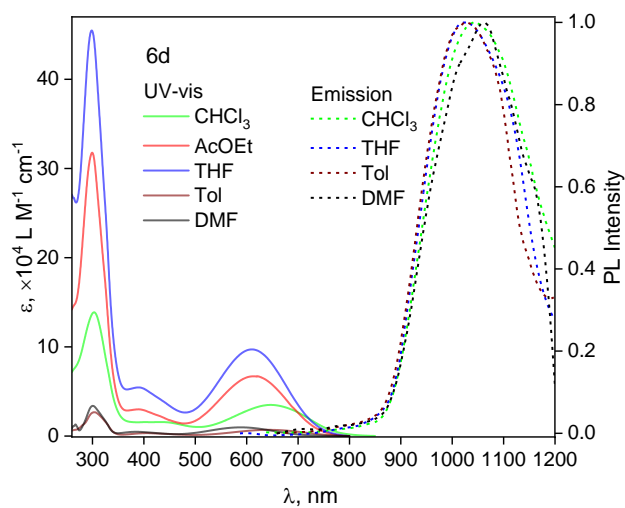

**Figure S1.** Absorption and luminescence spectra recorded upon excitation at the wavelength of absorption maximum ( $\lambda_{abs}$  ICT) for the **6e**, **6b**, **7e**, **7c**, **7d**, **6c** and **6d** compounds dissolved in different solvents.

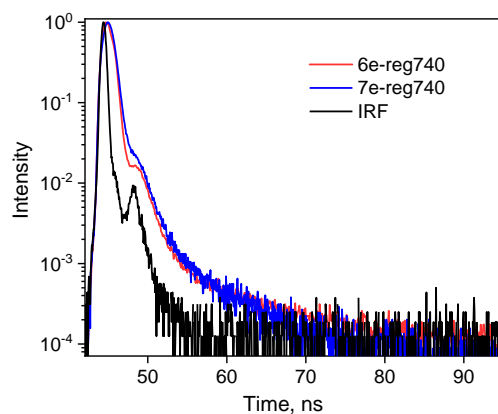

Figure S2. PL decays measured under excitation at 450 nm for **6e** and **7e** recorded at 740 nm at T=300 K. For **6e** compound the phosphorescence lifetime ( $\tau$ ) is  $10.1 \pm 0.8$  ns, for **7e**  $\tau = 7.0 \pm 0.4$  ns.

#### SI-4 Theoretical calculations

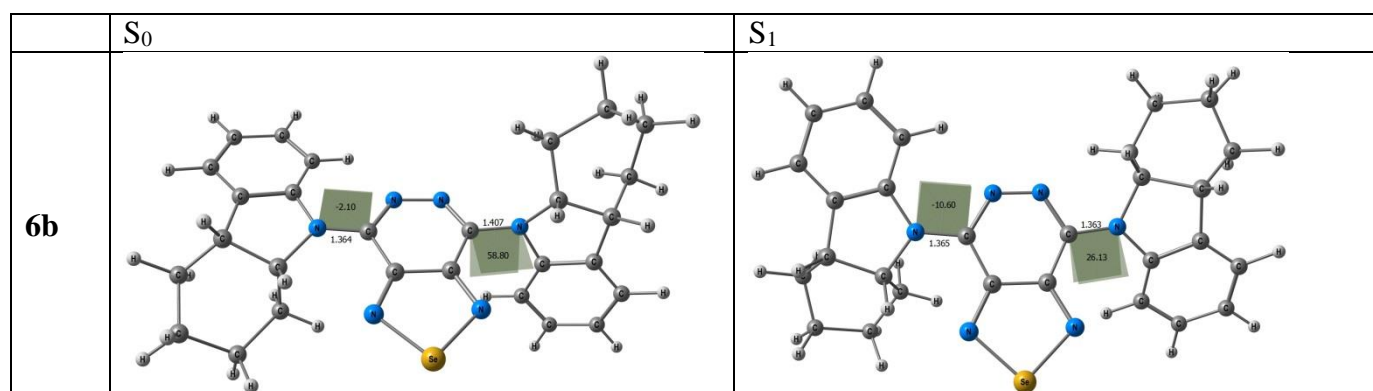



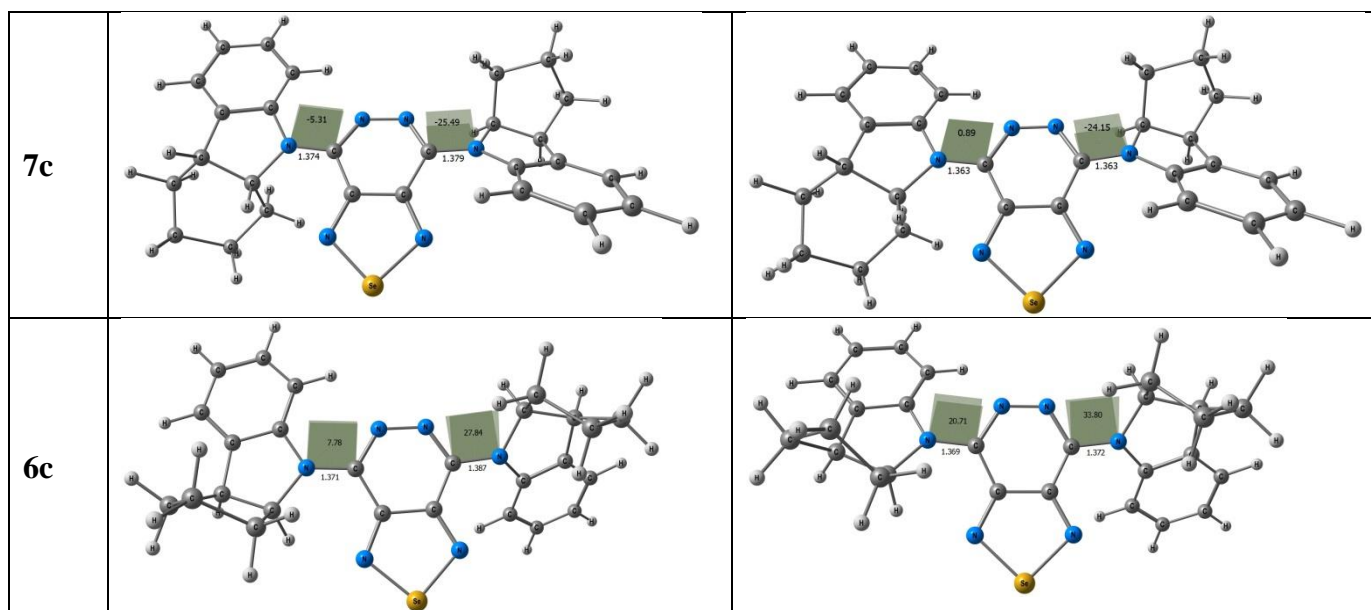

**Figure S2.** Optimized ground state ( $S_0$ ) and first excited singlet state ( $S_1$ ) geometries for **6b**, **7c**, **6c** and **6d**.

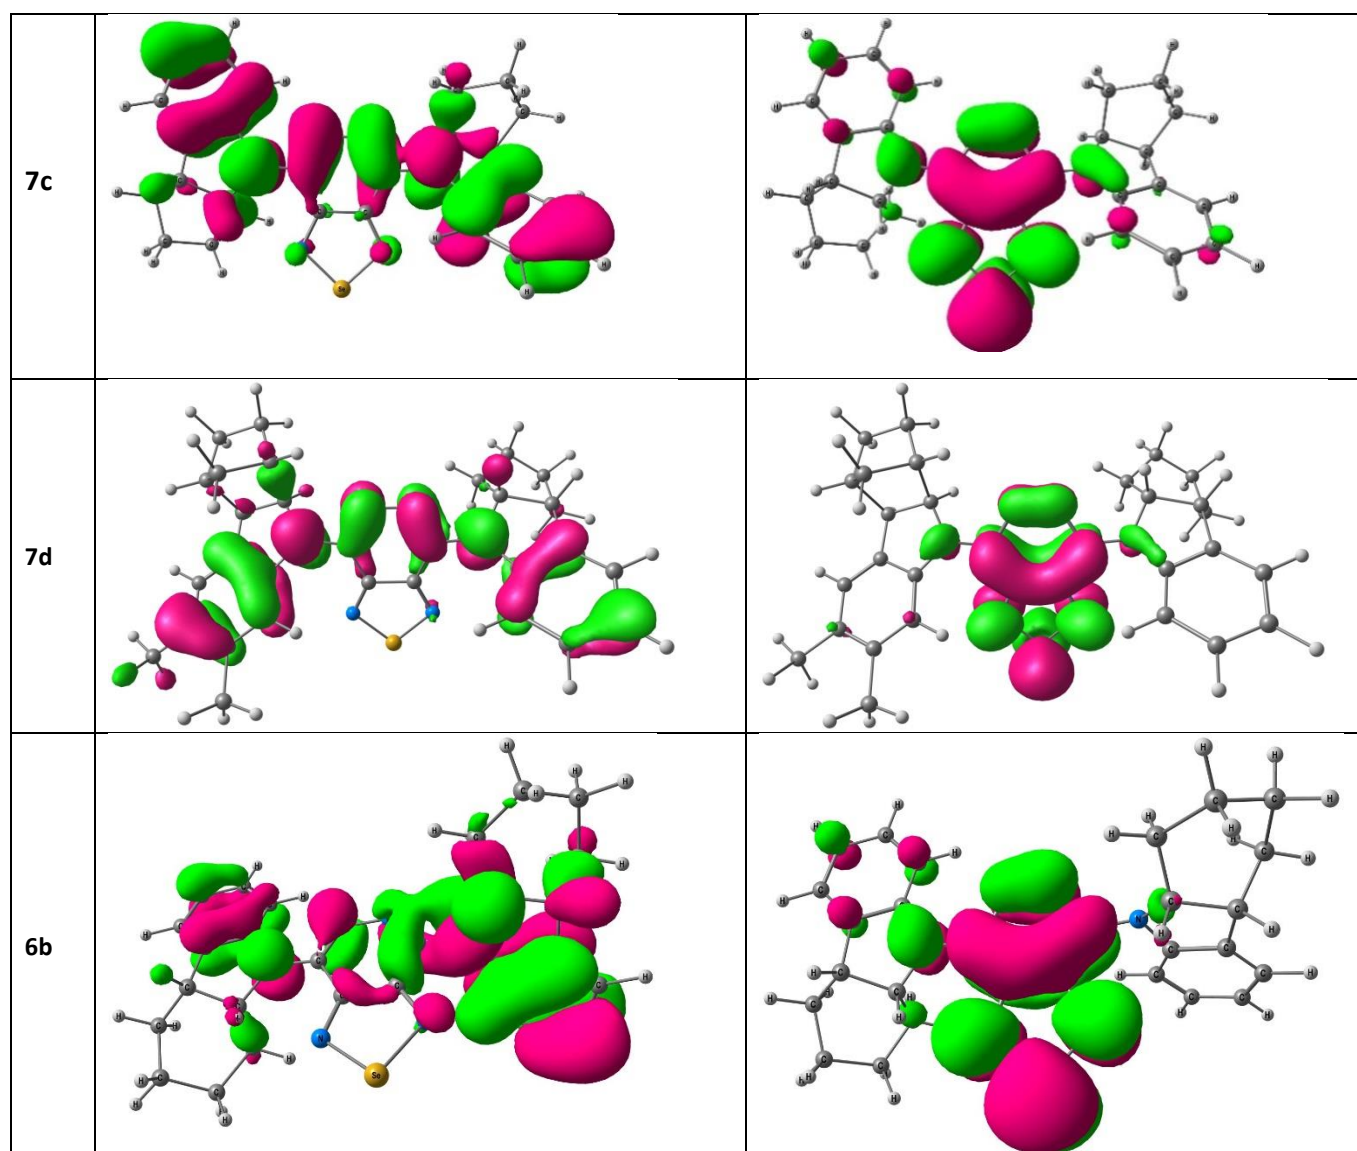

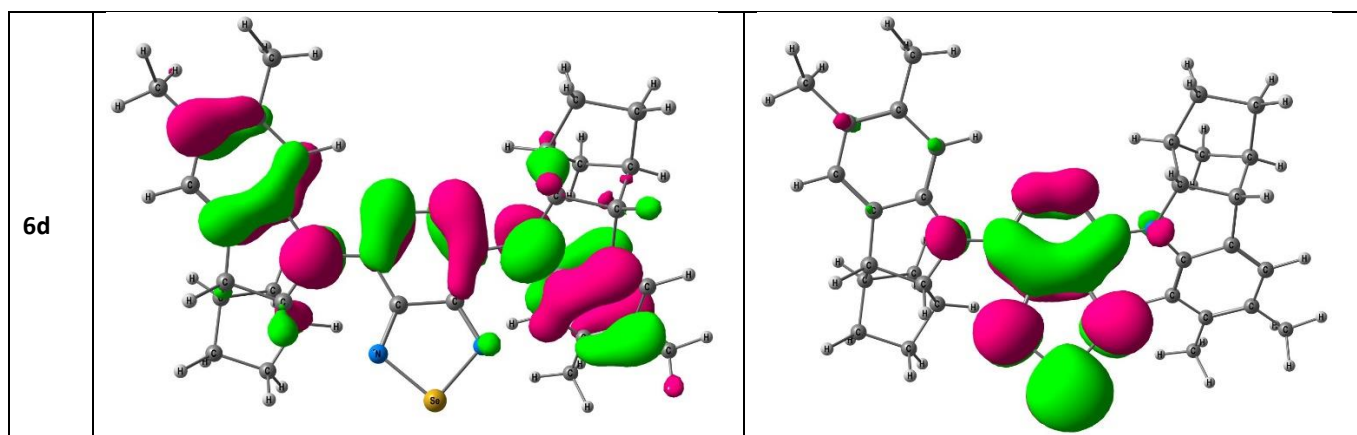

**Figure S3:** Frontier molecular orbitals calculated for equilibrium  $S_0$  geometries of the **7c**, **7d**, **6b** and **6d** compounds.

## SI-5 Cytotoxicity

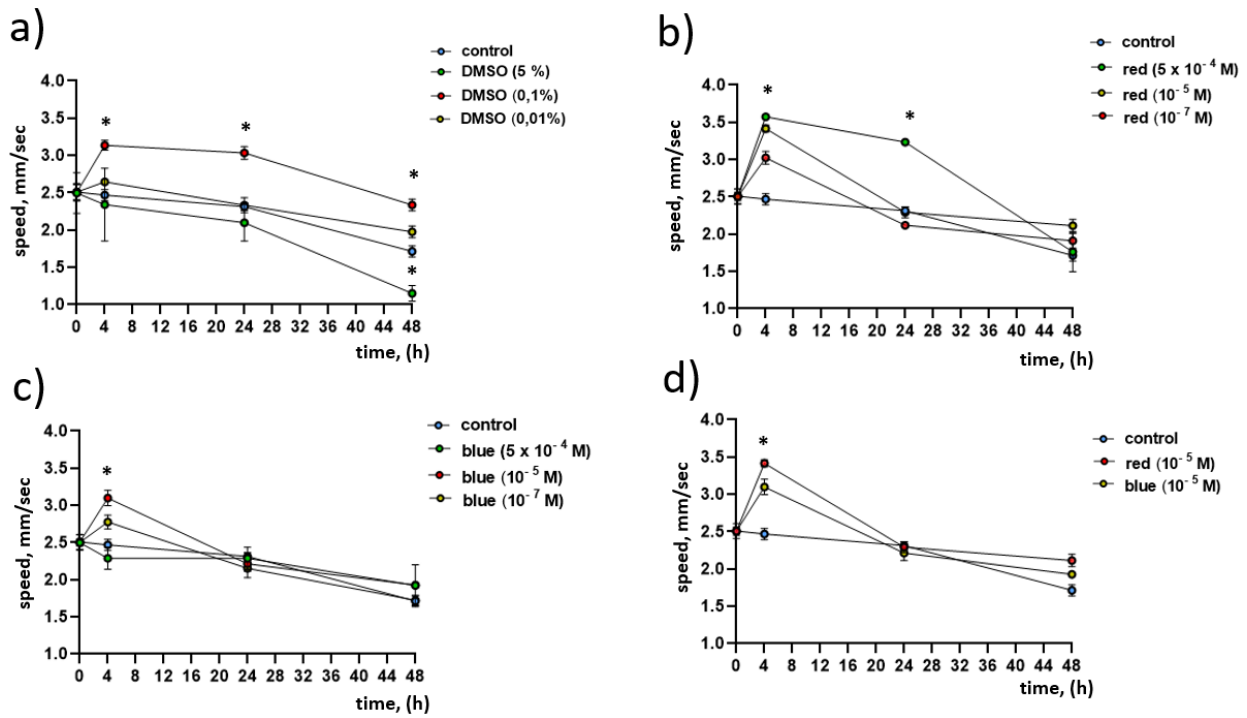

**Figure S4:** Changes in the swimming speed of *Paramecium caudatum* in response to the exposure to Red and Blue molecules at different concentrations. (a) Changes in cell movement speed under the influence of DMSO during the 48-hour observation period. Cell concentration -  $600 \pm 50$  cells/ml, \* - significant difference from the movement speed of cells in the intact group,  $p < 0.05$ , two-way ANOVA. (b) Changes in cell movement speed under the influence of Red molecules at concentrations of  $5 \times 10^{-4}$ ,  $10^{-5}$ ,  $10^{-7}$  M during the 48-hour observation period. Cell concentration -  $600 \pm 50$  cells/ml, \* - significant difference from the movement speed of cells in the intact group,  $p < 0.05$ , two-way ANOVA. (c) Changes in the movement speed of motile cells under the influence of Blue molecules at concentrations of  $5 \times 10^{-4}$ ,  $10^{-5}$ ,  $10^{-7}$  M during the 48-hour observation period. Cell concentration -  $600 \pm 50$  cells/ml, \* - significant difference from the movement speed of cells in the intact group,  $p < 0.05$ , two-way ANOVA. (d) Comparison of cell movement speed under the influence of **6e** and **6c** molecules at a concentration of  $10^{-5}$  M during the 48-hour observation period. Cell concentration -  $600 \pm 50$  cells/ml, \* - significant difference in cell movement speed between the groups with Red and Blue particles,  $p < 0.05$ , two-way ANOVA.
